# Supplementary material for: Mining key circadian biomarkers for major depressive disorder by integrating bioinformatics and machine learning
Source: publisher site journal article supplement (doi:10.18632/aging.205930), 2024-06-13
Supplement: Supplementary file [file aging-v16i12-205930-supplementary-material-SD1.pdf]

## SUPPLEMENTARY TABLE

**Supplementary Table 1. 1475 circadian rhythm genes (CRGs) collected from the MSigDB database.**

|          |         |          |          |          |          |              |          |          |          |         |         |
|----------|---------|----------|----------|----------|----------|--------------|----------|----------|----------|---------|---------|
| SLC2A2   | SUMO3   | SYNCRIP  | CCT7     | CCNE1    | CSMD1    | PPARGC1A     | DDIT3    | CBL      | CREB3L3  | KMT2D   | PI4KA   |
| RBP2     | GPR176  | PDZD3    | SSB      | DICER1   | ATM      | TNFRSF11A    | ATF3     | TSC2     | TRH      | NAT2    | SLC2A3  |
| MEF2D    | PSMC4   | AVPR1A   | RAB5B    | PEMT     | CYP2E1   | EPHB2        | CEBPG    | SPRY2    | DGKQ     | DIO3    | ADCY3   |
| CLOCK    | ATF2    | MAX      | SMCHD1   | RGS20    | VRK2     | PTCH1        | NPAS3    | GATD3    | MPO      | ICAM1   | APRT    |
| PER2     | APP     | CRTC2    | TAGLN2   | PGR      | PSMB1    | NEUROD1      | IL4      | CYP3A4   | SULT2A1  | CAVIN2  | BCKDK   |
| PER3     | FDFT1   | CRTC3    | RAB1A    | XPA      | PSMD12   | TRIM35       | PNPLA3   | MED9     | TELO2    | SULT1A1 | CYP7B1  |
| PER1     | PDE6B   | TDRKH    | HNRNP3   | SLC12A2  | RHOA     | NCOR2        | USP30    | SEM1     | EHMT2    | FABP4   | ENO2    |
| CRY1     | SUGP1   | RGS16    | AHNAK    | SLC5A1   | GSR      | MYBBP1A      | DDC      | BRINP1   | CDK6     | IL6R    | HPRT1   |
| ARNTL    | THBS1   | GNAQ     | EIF3E    | NUP98    | OLFML3   | CSNK1A1L     | MEF2A    | BLMH     | IKBKB    | ADRA2C  | PDK1    |
| CRY2     | ACADS   | TH       | RALY     | RAE1     | RB1      | MIF          | GUSB     | GRM5     | TPO      | UCP2    | SUCLA2  |
| TIMELESS | CLTC    | H2BC11   | AURKAIP1 | NPSR1    | GCK      | HTR1B        | KDM1A    | ARID1A   | NMNAT1   | WEE1    | ATIC    |
| NPAS2    | PLCB4   | SUV39H1  | APMAP    | HELLS    | ABCB7    | CALCA        | SRD5A1   | RABGEF1  | ABCC3    | EGFR    | CTPS1   |
| ARNTL2   | GLO1    | PRMT1    | MAGEC1   | IMMT     | ANGPTL2  | MAPK3        | DRD3     | RAP1GAP  | PKLR     | CYP1A1  | FDXR    |
| CIPC     | TIPIN   | RPS19    | CPNE9    | SUV39H2  | SNCA     | TRIP12       | PTGDR    | KCNQ1    | INPP5D   | CALB2   | GNAI1   |
| CSNK1D   | PPP2R1B | HMGA1    | HID1     | CHI3L1   | JAK2     | TERT         | ARRB1    | FOSB     | PFKP     | HDC     | GNAI2   |
| NR1D1    | PRKDC   | RPL36    | SEPTIN7  | MAFK     | NR1H3    | TNPO1        | CYP11B2  | GADD45A  | PIK3R5   | CDK2    | GPT2    |
| CSNK1E   | PRNP    | RPL39    | ADAR     | APC      | ESRRB    | PRKN         | MRE11    | TUBA1B   | ACSF3    | ARF1    | HSD17B4 |
| CIART    | SREBF1  | APOE     | USF1     | TF       | CAMK1    | LEMD3        | GLUL     | ABHD5    | IRF4     | GUCA2B  | ITPR3   |
| BHLHE40  | ENOX2   | KAT8     | ERN1     | MMP3     | NCAM1    | UCHL5        | PIK3C2A  | HS3ST2   | MECR     | DUSP4   | RAD21   |
| BHLHE41  | SLC41A1 | ADRB1    | CDKN2A   | COPA     | ATG14    | TBL3         | PPOX     | XBP1     | PANK2    | CYP1B1  | SMC3    |
| RORA     | TBL1X   | CBX3     | UBR5     | SERPINF2 | H2BC15   | UBE2O        | PCNA     | NFE2     | HAS3     | FADS1   | CHD2    |
| DBP      | GRP     | GPI      | ZBTB17   | STAR     | AQP3     | COP56        | BAX      | HMGCR    | B4GALT2  | CD25A   | ENPP2   |
| PASD1    | PPAT    | LEPR     | ATG7     | MITF     | SPSB1    | ZNF207       | ADRB2    | ANKK1    | CIDEC    | JUNB    | PCBD1   |
| NOCT     | XPO1    | ZNF44    | TRAF2    | GSTP1    | RPA2     | LOC102724428 | XDH      | HEBP1    | FFAR1    | FBXO31  | PFKFB3  |
| AANAT    | SPR     | PSME2    | ORMDL3   | PIK3R2   | MAOA     | ZNF174       | RPL3     | CYP11B1  | BRWD1    | CLSPN   | VAPB    |
| NR1D2    | HAT1    | METTL14  | CES1     | PEBP1    | FHIT     | USP38        | PSME4    | FABP7    | SERINC1  | EGF     | CTBP2   |
| FBXL3    | RACK1   | COPS2    | BGLAP    | ABCB1    | CHRM3    | OGG1         | HUS1     | DCP2     | DXH29    | FBXL14  | EBP     |
| SIRT1    | TGS1    | MAPK14   | HES1     | GIP      | NECTIN1  | KCNC2        | PRDX6    | SIM1     | SLC25A27 | ADK     | EMD     |
| NFIL3    | CHD9    | CS       | NPY2R    | EPO      | THPO     | AHRR         | SYP      | MT2A     | SRPRB    | CYP17A1 | GATAD2B |
| RAI1     | HELZ2   | PPP2R5D  | HRAS     | IFNA1    | RYR2     | CDKN1B       | IGF1R    | CHD4     | FUT5     | FBP1    | HDAC10  |
| GSK3B    | RASD1   | HSPA5    | AGRP     | SLC9A3   | AR       | PBRM1        | RRAS2    | CEBPE    | KCNG2    | IDS     | PI4KB   |
| OPN4     | KITLG   | ZBP2     | SHBG     | PPP2CA   | GGT1     | CST3         | EPB41    | MTAP     | YTHDC1   | CACNA1A | PTPN13  |
| BTRC     | HBB     | HSF1     | CDKN1A   | ATR      | NR1I2    | ADORA2A      | GRM7     | AFP      | EXOSC4   | GLDC    | SDC4    |
| NR3C1    | EPAS1   | P4HB     | RPS2     | MT1F     | NR6A1    | PRK11        | HABP2    | GAPVD1   | ENY2     | ACACB   | SDHD    |
| CREBBP   | NFKB2   | ALDOA    | ARN2     | FOXP3    | MAGEC2   | STX1A        | PRKCB    | RHOD     | H1-5     | AK1     | GNB2    |
| CSNK2A1  | LRPPRC  | TLN1     | ADCY1    | TLR4     | TAC1     | TAB2         | TRPA1    | ITGB1    | KMT5B    | AKR1B1  | GNB4    |
| HDAC3    | HSPA8   | PDIA6    | NAGLU    | SLC6A3   | GPT      | GFRA1        | CBLB     | PRKCD    | MTARC2   | HADHB   | SULT1A2 |
| TP53     | DNAA1   | HSPA1A   | NOS1     | HBA1     | SLC46A1  | PURA         | FANCL    | ADSL     | DUSP6    | LBR     | TINF2   |
| PPARA    | MAGED1  | FOXO1    | MAP2K7   | CELF2    | FGF21    | EIF4G2       | GRIK1    | ALDH6A1  | CXCL8    | ADD1    | BAZ1B   |
| ID2      | WDR5    | NCL      | PRKAA2   | CNP      | RPS6KA1  | MYF6         | PTPRT    | ADCY8    | HSPA4    | RBP4    | CUL7    |
| EP300    | AFF2    | SST      | SLC2A1   | TUBB     | DNAH8    | PRKAR1A      | QKI      | CA14     | HTR3A    | SULT2B1 | EBF1    |
| NCOA2    | CEBPA   | CCL2     | SLC16A1  | YWHAB    | CCL4     | BTG1         | ATRIP    | CYP51A1  | H3-3B    | PDK4    | GBA2    |
| CREB1    | BDNF    | HK1      | TMPO     | YWHAQ    | IGFBP7   | CLDN5        | COL9A1   | MANBA    | LPL      | AADAC   | GGT7    |
| CRTC1    | ATO7    | LMNA     | HTT      | DLGAP1   | ADIPOR1  | SNRNP200     | TOB1     | CCS      | ODC1     | ADH7    | SLC3A2  |
| PROK2    | APOA1   | PRKD1    | HNRNPK   | HNRNP3   | ADIPOR2  | LDHD         | DSCAM    | AK5      | PIK3CG   | DDAH1   | ST3GAL4 |
| PPP1CA   | VCP     | PGK1     | PRDX2    | NASP     | JUND     | NCKAP1       | NTM      | SLC25A17 | SSBP1    | MAOB    | BAZ1A   |
| PPP1CB   | FASN    | ACACA    | PSMC2    | ETV6     | PSME1    | NCOA4        | OPHN1    | BRMS1    | INTS2    | DIO1    | CDC16   |
| PPP1CC   | YWHAE   | MDH2     | ATF1     | STAT3    | PIGF     | HLA-DQB1     | RGS6     | DNAJC2   | GBA      | EXOSC2  | DDHD2   |
| NPY      | PAICS   | ENO1     | VRK3     | HTR2C    | CYP19A1  | RBPM5        | RND3     | PTGR2    | OPRM1    | EXOSC3  | HMG2    |
| NRIP1    | SIN3A   | HADHA    | HBA2     | CGA      | CAT      | ZFR          | DOCK4    | ER11     | MC4R     | FBP2    | CTPS2   |
| RORC     | GFPT1   | HSP90B1  | SRC      | GAST     | PDE4D    | DAZAP2       | SEC23IP  | NUDT3    | HPGDS    | IFN1    | MTMR6   |
| SERPINE1 | GNB3    | NME2     | PRDX1    | UCP3     | EYA1     | STBD1        | ANKS1B   | PPM1L    | BAD      | VAMP2   | RNF40   |
| THRAP3   | DRD4    | PCCA     | RANBP2   | ATP1A1   | OPCML    | GTDC1        | IRX1     | COQ10B   | SCN1A    | OSBP    | HNRNPA0 |
| MTNR1A   | APOB    | PCCB     | RPL10    | NPM1     | MYRIP    | APOH         | LRRRC4C  | YIF1A    | NR5A2    | AOC1    | MMS19   |
| EZH2     | MATR3   | VDAC1    | RUVBL1   | ATP1A3   | CUL3     | GRM1         | RNF19A   | SPTSSB   | KIF11    | EXOSC5  | MT1A    |
| RBM4     | YTHDF2  | CYB5R3   | RUVBL2   | CRKL     | SERPINA7 | MMADHC       | SORCS1   | HIKESHI  | PDE4A    | TNRC6A  | ABHD14B |
| KDM2A    | ADORA1  | SLC10A2  | RPS14    | MCM4     | GNA11    | HNRNPA2B1    | ATP10B   | MMP9     | TRPV6    | GJA1    | ATP6V0B |
| KMT2A    | GPR50   | HSD17B10 | RPS17    | YUFM     | FBXL17   | ST3GAL1      | CD180    | NRAR     | TRPV5    | MCL1    | GLYATL1 |
| USP2     | EXOC1   | NME1     | PSMC1    | TWHAH    | SKP2     | ING3         | FOXN3    | ZNF423   | GRIK2    | BRD4    | AGMO    |
| KDM5A    | YWHAZ   | PRKD3    | WDR77    | EEF1A2   | TGFB2    | ITPK1        | NAALADL2 | MEIS1    | MMP2     | FXN     | ATP5F1D |
| NONO     | CALB1   | MCCC2    | RAN      | EIF4A1   | ANP32A   | CYP2A6       | ARL4A    | SCYL1    | AKT1     | RPA1    | WAPL    |
| NAMPT    | TXN     | MCCC1    | NOS2     | MCM5     | PROKR2   | HCRTR1       | NCOA7    | TAC3     | TET2     | FDX1    | ATP5MC3 |
| RORB     | PLAT    | CAPZB    | CRHR1    | C1QBP    | PSMA4    | MTHFR        | NXPH1    | SELE     | UCP1     | RBP1    | CIAO2B  |

|         |         |          |          |         |          |                |         |         |         |         |         |
|---------|---------|----------|----------|---------|----------|----------------|---------|---------|---------|---------|---------|
| CREM    | MEF2C   | ERO1A    | CCNA2    | EIF4A2  | G0S2     | CREB3          | RASSF8  | PLK4    | CREB3L1 | TBXT    | S100G   |
| NMU     | ADCY10  | RPE65    | TFEB     | MCM7    | NFKB1    | P2RX7          | SPCS3   | RRBP1   | CYP8B1  | ABCC1   | MSH6    |
| ADCYAP1 | HERC2   | NGF      | KRAS     | XRCC6   | SDC3     | PARP1          | TANC2   | RND1    | RPS6KA5 | HMOX2   | BACE1   |
| MTNR1B  | CHEK1   | PIK3R1   | FBXO5    | KRT10   | RPS6KB1  | HSD11B2        | LCORL   | NOTCH1  | GCKR    | RNF2    | SMN2    |
| AHR     | SUMO1   | THBD     | CYP21A2  | NXN     | EIF4EBP1 | STAG2          | POF1B   | DHFR    | CYP1A2  | SETD7   | S100A1  |
| PRL     | EDN1    | FAM50B   | CAD      | PPP2R2A | SCT      | PEPC           | TXNDC2  | HIF1AN  | SULT1A3 | SREBF2  | PTMA    |
| CUL1    | EIF2AK3 | CDKN3    | COPS8    | RPN1    | PTEN     | INSL6          | VTA1    | MT3     | RBL1    | RPL4    | SPARC   |
| NCOR1   | CAMK2G  | AGT      | DYNCH1H1 | SLC25A5 | SMAD3    | SOX14          | BRMS1L  | USP46   | TIMP1   | SLC27A1 | UBE2N   |
| METTL3  | RPSA    | TKT      | TRPV1    | TCP1    | SNAI1    | FBXL12         | KCTD8   | HCFC1   | PTGS2   | CXXC1   | ASCL1   |
| MAPK8   | EEF2    | NOS3     | HDAC2    | XRCC5   | CD63     | FBXL6          | RHBDD1  | RING1   | PVALB   | PSMD8   | RAD18   |
| SFPQ    | CPNE8   | HSPD1    | SLC25A10 | XRN2    | GPD1     | FBXL8          | PELI2   | SEC13   | CDH1    | COX11   | TOPBP1  |
| KAT2B   | FLNA    | HNRNPL   | TOP2A    | DDX20   | TXNIP    | FBXL22         | ZNF662  | DDMAP1  | CCKBR   | H2AC6   | RAD9A   |
| MAGEL2  | MCM3    | GRIN2B   | FBXO9    | EFTUD2  | KCNH4    | ENS00000265690 | FERD3L  | PSMD13  | CYP11A1 | CASP8   | INTS7   |
| SPSB4   | CCT2    | RPS3     | FBXO22   | KHDRBS1 | BACH1    | HSD11B1        | MAP9    | COX7B   | HSPG2   | EEA1    | RAD1    |
| ID3     | CCT8    | SOD1     | ELANE    | KRT2    | LY96     | ELF5           | OR10R2  | NUP88   | ME1     | NFE2L1  | NABP2   |
| MTA1    | HNRNPA3 | UBA1     | FGF8     | PABPC1  | CLEC1B   | IL1RN          | HDX     | RPS4X   | RPL38   | SLC22A1 | ACKR1   |
| PRKCG   | HNRNPH2 | CAND1    | PHGDH    | PCBP1   | HK2      | ADRA2A         | CTXN3   | MED30   | PTS     | GDF15   | PTPRD   |
| IMPDH2  | CKAP4   | GABBR1   | ABCC2    | PRDX4   | TPT1     | ALPP           | CDC14C  | MED10   | IL1A    | ATF7    | CDC34   |
| UBE3A   | IGFBP1  | PTPA     | SDHA     | PTBP1   | PLIN1    | TGFB1          | ZBTB20  | CCND1   | EIF4G1  | BATF3   | CLDN1   |
| CDK5    | CSNK1G2 | SERPINA6 | ACLY     | USP11   | GRIN2C   | TAT            | BRF1    | PRKACB  | EIF3B   | COP1    | CSF1    |
| HIF1A   | UBA52   | GNAS     | MTHFD1   | AKAP8   | ACHE     | AVPR1B         | SCP2    | PRKACG  | TCF7L2  | ANGPTL8 | NEUROG1 |
| PHLPP1  | HNRNPA1 | KDM2B    | NDUFS3   | CCT4    | TSPO     | CP             | TSHB    | PRKAR1B | BMP4    | DLK1    | HDAC9   |
| NR0B2   | G6PD    | GAPDH    | GMPS     | GPRASP1 | PDPK1    | HNRNPD         | TCN1    | PRODH   | BRCA2   | CALR    | PLP1    |
| ID1     | PPP2R1A | CIRBP    | EEF1A1   | KPNA1   | PHB2     | ROCK1          | TCAP    | PRKAR2B | ABCC4   | CSN2    | PDE12   |
| HCRT    | CCK     | ALAS1    | ALDH9A1  | MAP4    | HFE      | TWIST1         | BSX     | ADRB3   | ALDH2   | CDH13   | GRIN2A  |
| VIP     | SENPI   | TFRC     | KHSRP    | PABPC4  | ETS1     | ARHGDI1A       | JUN     | DHCR7   | LIPE    | ADCY5   | FN1     |
| SKP1    | PPARD   | TIMP3    | SMC4     | CCT6A   | RHO      | NR1H4          | GLUD1   | SMC1A   | GHSR    | GLP1R   | GRIN1   |
| HNF4A   | TRIM28  | NOX4     | ANAPC7   | DDX17   | CYP3A5   | TLK2           | TDO2    | TAF1    | DRD1    | UBE2I   | IRS1    |
| INS     | CTNBN1  | COMT     | HSPA1B   | HNRNPF  | RBCK1    | KISS1          | PSEN2   | GNS     | GNRHR   | KMO     | ADARB1  |
| LEP     | PIWIL1  | BVES     | BAG2     | HNRNPM  | ADH4     | HSP90AB1       | RBX1    | NFKBIA  | MRGPRX1 | PNMT    | MAP2K5  |
| CA6     | NPY5R   | CSE1L    | SMC2     | ILF3    | SF3A3    | TPTEP2-CSNK1E  | GSK3A   | CAMK2D  | SCN5A   | BAG1    | NEFH    |
| DDB1    | EGR3    | CHEK2    | SRM      | DDX3Y   | LDHA     | ENHO           | OPRL1   | KMT2C   | SLC6A2  | G6PC2   | AKAP13  |
| KLF10   | CACUL1  | PPP2R5E  | DNAJC7   | DHX15   | TUBB3    | ACTL6A         | PNOC    | SMARCD1 | DDB2    | ACER2   | RAD17   |
| KAT5    | FBXL15  | ACTN1    | ATP5F1A  | SCYL2   | GSTM3    | CTCF           | NR4A1   | ACBD3   | CSNK1G3 | HEBP2   | SIRPA   |
| RBM4B   | RPS6    | KRT17    | MARS1    | GARS1   | LDHB     | ZNF704         | ID4     | RFX4    | POU1F1  | SLC48A1 | CD47    |
| USP9X   | CD36    | GFPT2    | DARS1    | GEMIN5  | IDI1     | IL2RA          | CYP2C19 | PPP4C   | TRIM24  | RHNO1   | CUL4B   |
| PIWIL2  | PSMD2   | DDX3X    | DCTPP1   | PABPC3  | LDHC     | TNRC6B         | YY1     | SETD2   | FOSL2   | BOK     | GNAZ    |
| SIRT6   | CPT1A   | CCT5     | EPRS1    | SEC16A  | UGP2     | GCH1           | KCNH7   | HNMT    | RBM3    | RAB27A  | VAMP7   |
| KLF15   | UBC     | PKM      | LARS1    | PPP2R2D | VAPA     | TYMS           | FKBP5   | MFSD2A  | USP21   | PAX6    | NES     |
| IL6     | NTS     | GSN      | RARS1    | OBI1    | AZIN1    | TPH2           | GFAP    | IDH1    | NQO2    | MGMT    | UBE2K   |
| TNF     | PSMC3   | ACTN4    | GCN1     | CACNA1C | HLA-DMA  | OXT            | AHCY    | ATF5    | PAH     | ACTB    | AMBRA1  |
| MAPK10  | PSMC5   | MYH14    | CYP7A1   | GC      | HERPUD1  | ATF6           | HCN2    | IL2     | MAT1A   | ECE1    | DCAF8   |
| MAPK9   | PSMD3   | DDOST    | ERC2     | PTGDS   | PPP1R3C  | DIO2           | BLZF1   | APOA4   | MAT2A   | STXBP1  | WDR61   |
| SIK1    | PSMD11  | FLNC     | DEFB1    | SYVN1   | IFNG     | PDC            | SLC24A3 | RARG    | QDPR    | CPS1    | CEBPZ   |
| VIPR2   | PSMC6   | EZR      | CEBPB    | RRH     | DUSP1    | VWF            | PLAU    | THRA    | MECP2   | CYP2C8  | DCAF7   |
| HUWE1   | PSMD1   | KRT6A    | CYP2D6   | SCN8A   | OXTR     | ADCYAP1R1      | MEN1    | MYOD1   | ST3GAL3 | GALNS   | INTS3   |
| ASS1    | PSEN1   | PLEC     | CHKA     | LMAN1   | TRRAP    | PFAS           | DROSHA  | G6PC1   | RAPGEF3 | MAP2K3  | NOL7    |
| DDA1    | DCAF11  | DET1     | PTPDC1   | H2BC12L | MIR6883  | BTBD9          | CARTPT  | CDK4    | CHRM1   | CHRN2   | CLDN4   |
| CRX     | DDX5    | DHX9     | DYRK1A   | FAS     | GHRH     | HNF1B          | HOMER1  | KCND2   | KCNMA1  | LGR4    | MIR1281 |
| MIR3064 | MIR4751 | MIR5047  | MIR5572  | MTTP    | NLGN1    | NPS            | NTRK1   | NTRK3   | OPN3    | PAX4    | PRF1    |
| PRKAA1  | PRKG2   | PROK1    | ROCK2    | SETX    | SFTPC    | SIX3           | UTS2    | UTS2R   | ZFH3    | ELOVL3  | DELEC1  |
| CSF2    | GHRHR   | FBXL21P  | TIMELESS | HNRNPD  | MYBBP1A  | KCNA2          |         |         |         |         |         |
